# Supplementary material
Source: PubMed Central journal article supplement (PMC4295391)
Supplement: MCB.00982-14_zmb999100686so2.pdf [file MCB.00982-14_zmb999100686so2.pdf]

**Table S2. Oligonucleotide primers used in this study**

| Primers for JUN cloning | Forward Primer                                 | Reverse Primer                            |
|-------------------------|------------------------------------------------|-------------------------------------------|
| c-JUN                   | CTAGAATTCACCGGTATGACTGCAAAGAT<br>GGAAACGACCTTC | TCTGCAATGAATTCATCAAATGTTTGC<br>AACTGCTGCG |
| JUNB                    | CTAGAATTCACCGGTATGTGCACTAAAAT<br>GGAACAGCCCTTC | TCTGCAATGAATTCATCAGAAGGCGTG<br>TCCCTTGAC  |
| JUND                    | CTAGAATTCACCGGTATGGAAACACCCTT<br>CTACGGCGATG   | TCTGCAATGAATTCATCAGTACGCGGG<br>CACCTGG    |
| Primers for RT-PCR      | Forward Primer                                 | Reverse Primer                            |
| PLAU                    | GCTGACACGCTTGCTCACC                            | CGTTATACATCGAGGGCAGGC                     |
| RASSF8                  | GGAGCCCATTGAAATAGAGGCC                         | CGAGATGAACCAGGTCGCTTCA                    |
| THBS1                   | CCTGTTCTGATGCATGTGTGTG                         | GGATCAGGTTGGCATCCTCG                      |
| PTHLH                   | ACTGGTTCAGCAGTGGAGCG                           | GAGCTGATGTTGAGACACAGC                     |
| S100A10                 | GTAATAAGGAAGGCGCACAG                           | TTGGTGTGGTCCGTTGAAGC                      |
| ARHGAP29                | GGAATCAGAACGCAAGCAAAATGCG                      | GGGATGCTGATTCAGCCTCTTGG                   |
| EEF1a                   | GCCCCAGGACACAGAGACTTTATC                       | CAACACCAGCAGCAACAATCAG                    |
| YAP1                    | CCGACTCCTTCTTCAAGCCG                           | CGAACATGCTGTGGAGTCAGG                     |
| KRT4                    | GAGATCGAGAACATCAAGAAGC                         | CTCACCTCGCTGCTCTGC                        |
| TGIF1                   | GGAGATCCAGAATGAAAGGCAAG                        | CCTGAGCCAGCGGATGAAG                       |
| SERPINE8                | CTTGCTTAGAACTGCCAACAGAC                        | GCAAAGGACAACCTCCTCCAGC                    |
| TXNDC5                  | GGATGCTGCAGACACTGAACG                          | CTCATACAGCCCTTGCTTGAGC                    |
| FGF1                    | GGATCCTTCCGGATGGCAC                            | GTACTGGCCAGTCTCGGTAC                      |
| ADAM19                  | GCATGTGCCTCACCTACCAG                           | GTGTCTCCTGCCACATTCACC                     |
| SERPINE1                | CCTAGAGAACCTGGGAATGACC                         | CCTCGATCTTCACTTTCTGCAGC                   |
| Primers for ChIP        | Forward Primer                                 | Reverse Primer                            |
| chr9:297,584            | CTCCTGTCTGCATCTAGGTGC                          | CTCCTGTCTGCATCTAGGTGC                     |
| chr17:60,548,364        | CTGACAGTTCAGCCAGGTGC                           | GAGACCATCTGTGTAAAGTGG                     |
| chr6:48,795,234         | TTGATGGTTCCTCACAGGAAGG                         | TGACTCTTCTCGTTCAAACC                      |
| chr8:145,010,823        | CTCAGCTCTCAGATTTGTGG                           | AGCCTCCCTGTGGAGGAATGC                     |
